# Supplementary material
Source: PubMed Central journal article supplement (PMC3667652)
Supplement: NIHMS454702-supplement-Supplementary_figures.pdf [file NIHMS454702-supplement-Supplementary_figures.pdf]

## Effects of Ketamine in Treatment-Refractory Obsessive-Compulsive Disorder

### Supplemental Information

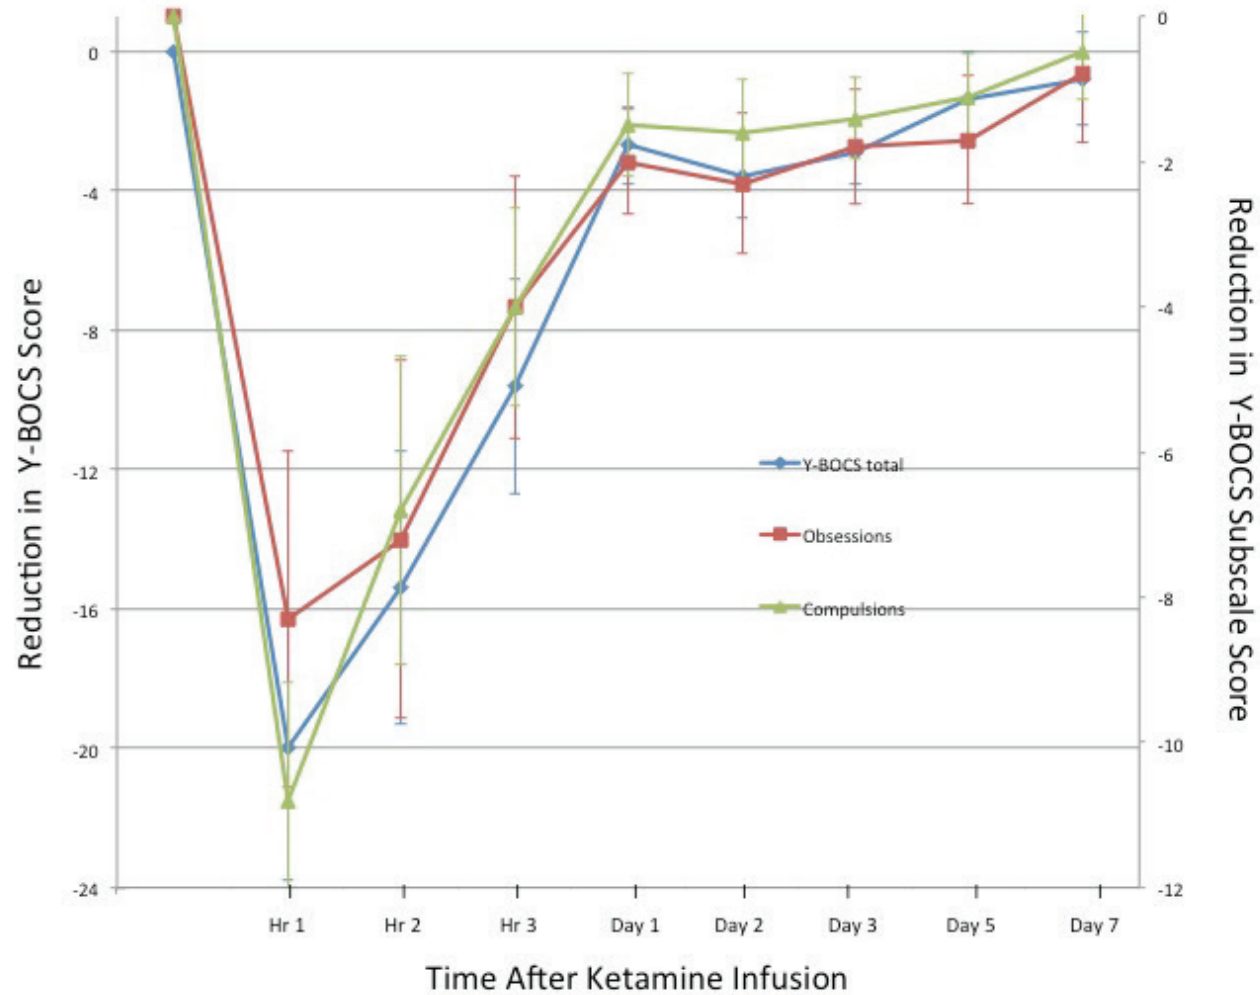

**Figure S1.** Effects of Ketamine on Obsession and Compulsion Subscales of the Yale-Brown Obsessive-Compulsive Scale (Y-BOCS).

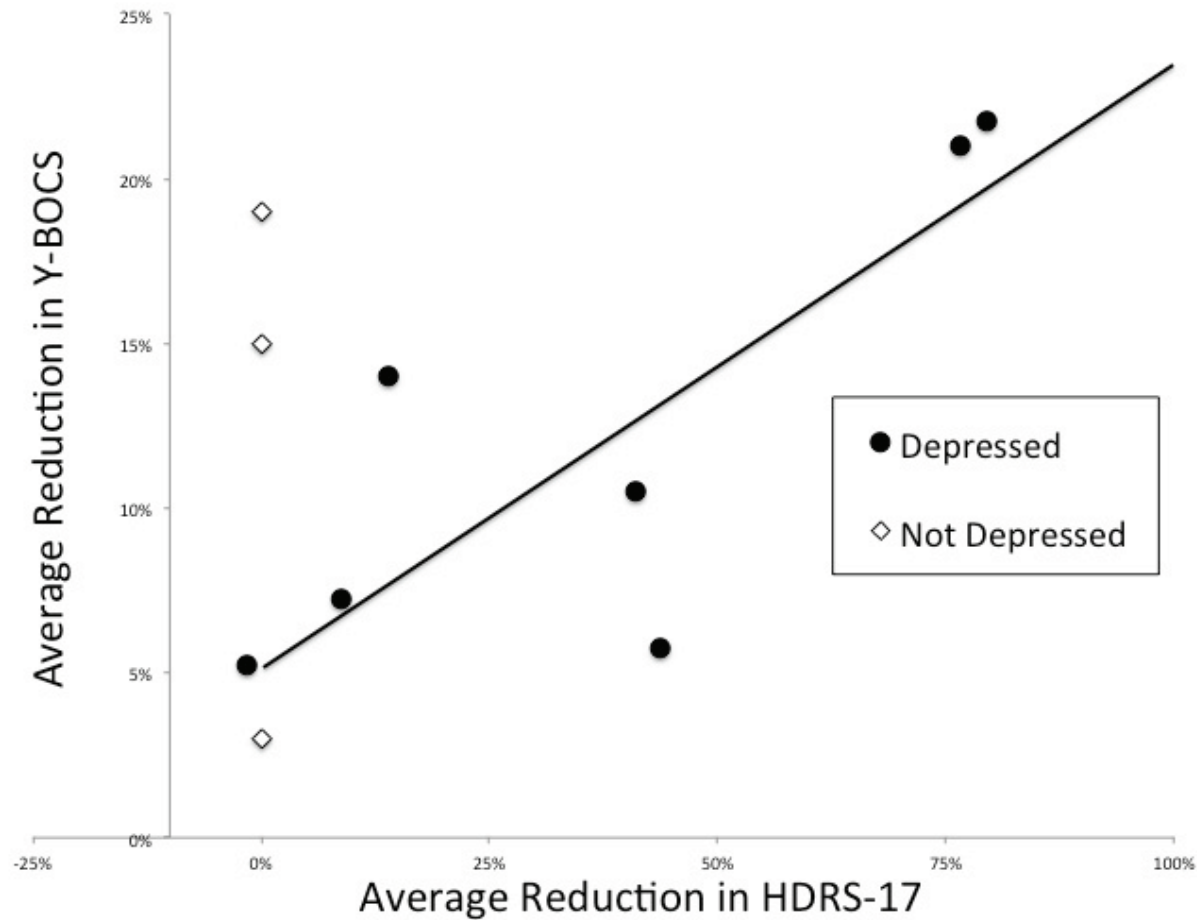

**Figure S2.** Correlation between Average Improvement in OCD and Depressive Symptoms in the First 3 Days Following Ketamine Infusion. Overall average improvement in depressive symptoms was significantly correlated with the average improvement in OCD symptoms in the first 3 days following ketamine infusion ( $r = 0.82$ ,  $p = 0.02$ ). HDRS-17, Hamilton Depression Rating Scale-17 item; OCD, obsessive-compulsive disorder; Y-BOCS, Yale-Brown Obsessive-Compulsive Scale.

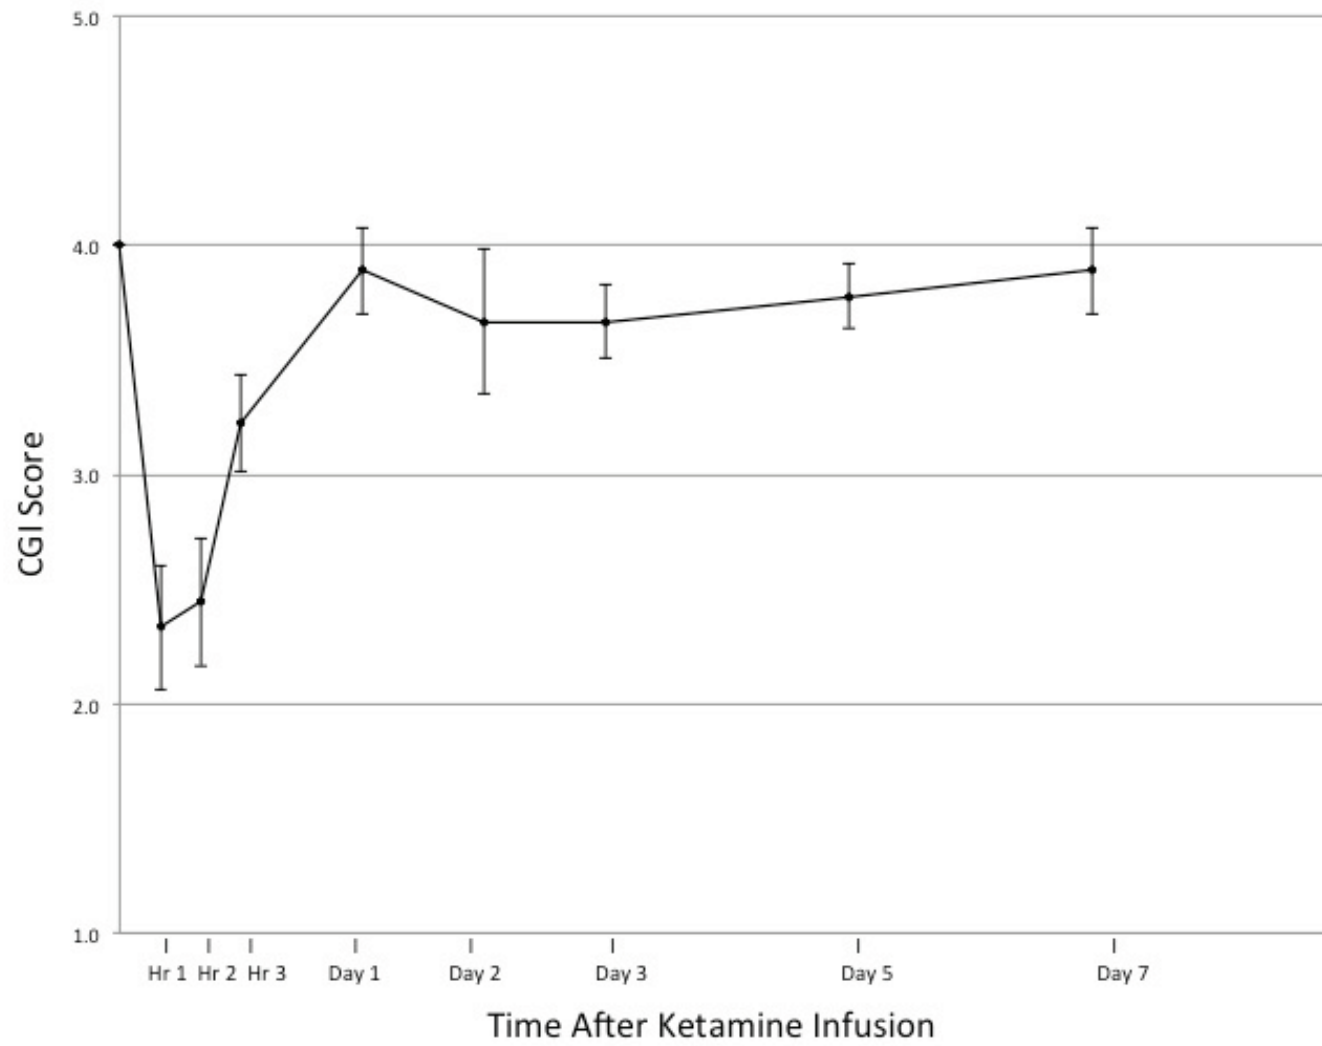

**Figure S3.** Effects of Ketamine on Clinician-rated Global Improvement. CGI, Clinical Global Impression.
